# Supplementary material
Source: MDPI journal article supplement (https://www.mdpi.com/2072-4292/14/16/4045)
Supplement: s1 [file s1]

# An Improved Aerosol Optical Depth Retrieval Algorithm for Multiangle Directional Polarimetric Camera (DPC)

Bangyu Ge, Zhengqiang Li, Cheng Chen, Weizhen Hou, Yisong Xie, Sifeng Zhu,  
Lili Qie, Ying Zhang, Kaitao Li, Hua Xu, Yan Ma, Lei Yan and Xiaodong Mei

## S1.MODIS products

### 1. MYD09

MODIS surface reflectance (MYD09) products have been corrected for the effects of atmospheric gases and aerosols under cloud-free conditions and were stored in a 5-min swath. A global validation shows that most surface reflectance (SR) products are within theoretical one-sigma error ( $\pm 0.005 + 5\%$ ). In this paper, three years (2016–2018) MYD09 Scientific Data Set (SDS) data: 1km Atmospheric Optical Depth Band 3, 1km Reflectance Data State QA and 1km Surface Reflectance band1, band2, band9, band10 were used to analyze and construct the constraints of DPC SRRs. In addition, corresponding MYD03 products (1km) were used to provide solar, satellite zenith and azimuth angles, and land/sea masks.

### 2. MCD43D

MCD43D is retrieved separately from the MCD43A1, but the daily product is at a global scale, and the spatial resolution is 30 arc-second (about 1 km). Because of the large size, each RossThick-LiSparseReciprocal (RTLSR) BRDF model kernel coefficients product for all seven bands is stored in a separate MCD43D file. In this study, b7, three kernel coefficient products: isotropic (MCD43D19), volume (MCD43D20), and geometry (MCD43D21), were used to construct the BRDF shape.

### 3. MYD08\_D

MODIS gridded atmosphere daily global joint products (MYD08\_D3) contain daily  $1 \times 1$  degree grid average values of atmospheric parameters. In this study, the total ozone burden and atmospheric water vapor of MYD08\_D3 were used to correct the influences of the gaseous absorption.

### 4. MCD12Q1

MCD12Q1 IGBP classification product mentioned in Section 2.1 was used to determine surface types.

### 5. Aerosol products

MYD04\_L2 (10 km) is the aerosol products that are retrieved from DT and DB operational algorithms. In addition, DT also provides 3km aerosol products (MYD04\_3k) to monitor aerosol parameters at small or local scales [1]. In this study, the MYD04\_L2 (C6.1) SDS: Image\_Optical\_Depth\_Land\_And\_Ocean (MYD04\_L2\_DT), Deep\_Blue\_Aerosol\_Optical\_Depth\_550\_Land (MYD04\_L2\_DB), and Image\_Optical\_Depth\_Land\_And\_Ocean (MYD04\_3k\_DT) from MYD04\_3k (C6.1) were used to compare with DPC aerosol products.
